# Supplementary material for: IFNL3 mRNA structure is remodeled by a functional non-coding polymorphism associated with hepatitis C virus clearance
Source: PubMed Central journal article supplement (PMC4631997; doi:10.1038/srep16037), 2015-11-04
Supplement: srep16037-s2.pdf [file srep16037-s2.pdf]

## Raw SHAPE reactivities

|    | sequence | rs4803217 G | rs4803217 T |
|----|----------|-------------|-------------|
| 1  | A        | -0.058307   | 0.044643    |
| 2  | C        | 0.163034    | -0.095498   |
| 3  | C        | -0.437721   | -0.260724   |
| 4  | G        | 0           | 0           |
| 5  | G        | -0.25759    | -0.05544    |
| 6  | C        | 0.03409     | 0.62532     |
| 7  | T        | 0           | 0           |
| 8  | C        | -0.027717   | 0.723686    |
| 9  | C        | 0.227478    | -0.162552   |
| 10 | A        | 0           | 0           |
| 11 | G        | 0.227941    | 0.305351    |
| 12 | G        | -0.013796   | -0.491233   |
| 13 | A        | -0.045593   | 0.060919    |
| 14 | G        | -0.348938   | -0.711182   |
| 15 | G        | -0.791468   | -1.002216   |
| 16 | C        | -0.47306    | -0.009033   |
| 17 | C        | -0.117711   | -0.086514   |
| 18 | C        | 0.574091    | -0.055423   |
| 19 | C        | -0.681479   | -0.224353   |
| 20 | A        | 0.233622    | 0.266306    |
| 21 | A        | 0.55811     | 0.573367    |
| 22 | A        | 0.241081    | 0.276176    |
| 23 | A        | 0.399277    | 0.889275    |
| 24 | A        | 1.278185    | 0.977057    |
| 25 | A        | 0.057207    | 0.302984    |
| 26 | G        | 0.537017    | 0.217303    |
| 27 | G        | -0.164908   | -0.03732    |
| 28 | A        | -0.045436   | -0.425863   |
| 29 | G        | -0.495124   | -0.027174   |
| 30 | T        | 0           | 0           |
| 31 | C        | 0.492105    | 0.288204    |
| 32 | C        | -0.516846   | 0.633747    |
| 33 | C        | -0.224789   | 1.289507    |
| 34 | C        | 1.735802    | 0.207263    |
| 35 | T        | 0.027599    | 0.205257    |
| 36 | G        | 0.169028    | 0.039469    |
| 37 | G        | -0.009125   | -0.285275   |
| 38 | C        | 0.217265    | 0.604227    |
| 39 | T        | -0.232587   | 0.440143    |
| 40 | G        | -0.083709   | -0.163417   |
| 41 | C        | -0.123846   | 0.105399    |
| 42 | C        | 0.721896    | -0.068558   |
| 43 | T        | 0.098088    | 0.105542    |
| 44 | C        | 1.579105    | 0.87034     |
| 45 | G        | 0.037465    | 0.138956    |

|    |   |           |           |
|----|---|-----------|-----------|
| 46 | A | -0.185415 | 0.357104  |
| 47 | G | -0.325419 | 0.248293  |
| 48 | G | -0.234154 | -0.173707 |
| 49 | C | -0.197204 | 0.439804  |
| 50 | C | -0.364673 | -0.481471 |
| 51 | T | 0.084795  | -0.123655 |
| 52 | C | 0.25889   | 0.875335  |
| 53 | T | -0.120058 | 0.72044   |
| 54 | G | 0.661341  | 0.49774   |
| 55 | T | 0.008587  | 0.735957  |
| 56 | C | 0.09007   | -0.113186 |
| 57 | A | 0.134086  | 0.040903  |
| 58 | C | 0.523982  | -0.156771 |
| 59 | C | -0.288988 | -0.246427 |
| 60 | T | 0.246879  | 0.691295  |
| 61 | T | 0.635031  | 0.168582  |
| 62 | C | 0.11259   | -0.239836 |
| 63 | A | 0.065313  | 0.614851  |
| 64 | A | 0.361274  | 0.865388  |
| 65 | C | -0.775653 | -0.274502 |
| 66 | C | -0.314996 | 0.395236  |
| 67 | T | 0.26402   | 0.144646  |
| 68 | C | -0.085726 | -0.647472 |
| 69 | T | 0.160353  | -0.11671  |
| 70 | T | 0.16093   | 0.756263  |
| 71 | C | 0.204587  | 0.551633  |
| 72 | C | -0.385568 | -0.280799 |
| 73 | G | 0         | 0         |
| 74 | C | 0.314854  | 0.370345  |
| 75 | C | -0.01221  | 0.886268  |
| 76 | T | -0.053276 | 1.379624  |
| 77 | C | 1.129483  | 0.521682  |
| 78 | C | 0.080734  | 1.292831  |
| 79 | T | 1.244031  | 1.13022   |
| 80 | C | 0.792627  | 1.211164  |
| 81 | A | 0.323616  | 0.889185  |
| 82 | C | 0.402042  | 0.763923  |
| 83 | G | -0.065853 | 0.653146  |
| 84 | C | 2.19459   | 1.222729  |
| 85 | G | 1.165718  | 0.617749  |
| 86 | A | 0.723979  | 0.320732  |
| 87 | G | -0.08413  | 0.13272   |
| 88 | A | 0.120747  | 0.258099  |
| 89 | C | -0.402363 | 0.364026  |
| 90 | C | 0.590223  | 1.697097  |
| 91 | T | 0.594884  | 2.015163  |
| 92 | G | 0.505771  | 0.941986  |

|     |   |           |           |
|-----|---|-----------|-----------|
| 93  | A | 0.97321   | 0.907594  |
| 94  | A | 2.167485  | 1.236452  |
| 95  | T | 1.096071  | 0.639564  |
| 96  | T | 0.233225  | 0.246273  |
| 97  | G | 0.658279  | 0.291846  |
| 98  | T | 0.058646  | 0.591072  |
| 99  | G | 1.077651  | 0.826507  |
| 100 | T | -0.430311 | 0.130412  |
| 101 | T | 0.723663  | 0.895477  |
| 102 | G | 0.336148  | 0.765403  |
| 103 | C | 0.913263  | 0.731931  |
| 104 | C | 0.638247  | 0.617135  |
| 105 | A | -0.058516 | 0.308146  |
| 106 | G | 1.201145  | 0.772804  |
| 107 | C | 1.205579  | 0.617125  |
| 108 | G | 0.123138  | -0.219705 |
| 109 | G | 0.653839  | 0.826412  |
| 110 | G | -0.576624 | -0.644003 |
| 111 | G | 0.518139  | 1.241578  |
| 112 | A | -0.049632 | -0.103574 |
| 113 | C | 0.899877  | -0.063279 |
| 114 | C | 0.509315  | 0.45975   |
| 115 | T | -1.306303 | -0.428717 |
| 116 | G | 0.466457  | 1.167495  |
| 117 | T | -0.143998 | -0.342636 |
| 118 | G | 0.022914  | 0.431782  |
| 119 | T | 0.50768   | -0.015114 |
| 120 | G | 0.607926  | 0.812313  |
| 121 | T | -0.457025 | 0.47229   |
| 122 | C | 0.323908  | 0.416621  |
| 123 | T | 0.105211  | 0.37497   |
| 124 | G | 0.391607  | -0.311805 |
| 125 | A | 1.405144  | 1.057701  |
| 126 | C | 0.343232  | -0.60971  |
| 127 | C | -0.40581  | -0.254628 |
| 128 | C | -0.367625 | 0.205851  |
| 129 | T | 0.866595  | 0.552864  |
| 130 | T | 0.096668  | 1.298862  |
| 131 | C | 0.017585  | -0.304657 |
| 132 | C | 1.320541  | 0.319064  |
| 133 | G | -0.186732 | -0.033646 |
| 134 | C | 1.530169  | 2.923263  |
| 135 | C | 0.085022  | 0.499613  |
| 136 | A | 0.611433  | -0.111885 |
| 137 | G | 1.056995  | -0.238411 |
| 138 | T | -0.570998 | 0.636314  |
| 139 | C | 0.090579  | 0.449312  |

|     |   |           |           |
|-----|---|-----------|-----------|
| 140 | A | 0.404559  | 0.785051  |
| 141 | T | 0.227298  | 0.179427  |
| 142 | G | 0.434925  | 0.632644  |
| 143 | C | 0.633794  | 0.696816  |
| 144 | A | -0.203285 | 0.160966  |
| 145 | A | 0.939326  | 0.256513  |
| 146 | C | -0.202799 | 0.955804  |
| 147 | C | -0.078414 | 0.621681  |
| 148 | T | -0.043022 | 0.352566  |
| 149 | G | 0.248886  | 0.247861  |
| 150 | A | -0.849252 | 0.581837  |
| 151 | G | -0.003818 | 0.101284  |
| 152 | A | 0.940812  | 1.856391  |
| 153 | T | 0.048512  | 0.053288  |
| 154 | T | -0.427013 | -0.043521 |
| 155 | T | 4.309176  | 0.919874  |
| 156 | T | 0.209884  | 0.714578  |
| 157 | A | 2.41558   | 1.674391  |
| 158 | T | -0.673106 | 1.034687  |
| 159 | T | -0.706914 | 1.533292  |
| 160 | T | -0.777643 | -0.016482 |
| 161 | A | 1.062438  | 1.375678  |
| 162 | T | 3.481367  | 0.465363  |
| 163 | A | -0.016174 | 0.245423  |
| 164 | A | 1.140794  | 1.894566  |
| 165 | A | 0.924096  | 0.789511  |
| 166 | T | 0.24417   | 0.482119  |
| 167 | T | 0.319236  | 0.20629   |
| 168 | A | -0.221198 | -0.285444 |
| 169 | G | 1.202764  | 0.733176  |
| 170 | C | 0.376383  | 0.320933  |
| 171 | C | 0.311824  | 1.060597  |
| 172 | A | 0.43342   | 0.255369  |
| 173 | C | 1.720269  | 0.273119  |
| 174 | T | 1.141573  | 1.191642  |
| 175 | T | 0.846244  | 0.974621  |
| 176 | G | -0.160874 | -0.402926 |
| 177 | G | 0         | 0         |
| 178 | C | 0.341749  | 0.581558  |
| 179 | T | 0.698115  | 0.009804  |
| 180 | T | 0.142039  | 2.09628   |
| 181 | A | 0.253191  | 1.024176  |
| 182 | A | -0.049265 | 0.5567    |
| 183 | T | -0.027626 | 0.257017  |
| 184 | T | 0.678952  | 0.22355   |
| 185 | T | -0.008485 | 0.983171  |
| 186 | A | 1.20973   | 1.301559  |

|     |   |           |           |
|-----|---|-----------|-----------|
| 187 | T | 1.204483  | 0.370438  |
| 188 | T | 0.626027  | 0.37268   |
| 189 | G | 0.591424  | 0.43117   |
| 190 | T | -0.167665 | 0.199125  |
| 191 | C | 0.802219  | 0.601481  |
| 192 | A | 0.385316  | 0.397238  |
| 193 | C | -0.253374 | -0.136338 |
| 194 | C | 0.210269  | 0.614671  |
| 195 | C | 0.005922  | 1.587471  |
| 196 | A | 0.463785  | 0.451964  |
| 197 | G | 0.250875  | 0.397766  |
| 198 | T | 1.162025  | 0.121737  |
| 199 | C | 0.375354  | 0.418628  |
| 200 | G | 0.242815  | 0.442185  |
| 201 | C | 1.052008  | 1.823644  |
| 202 | T | 0.124868  | 0.569742  |
| 203 | A | 0.064325  | 0.143075  |
| 204 | T | -0.271914 | 0.063677  |
| 205 | T | 0.32649   | 0.994521  |
| 206 | T | 0.191759  | 0.753137  |
| 207 | A | 1.441154  | 0.484805  |
| 208 | T | 1.911027  | 1.184443  |
| 209 | G | 1.029237  | 1.083196  |
| 210 | T | -0.133517 | -0.606856 |
| 211 | A | 0.552786  | 1.296013  |
| 212 | T | -0.92074  | 1.161395  |
| 213 | T | 10.215613 | 7.801866  |
| 214 | T | 0.324667  | 0.332855  |
| 215 | G | 0.774434  | 0.551173  |
| 216 | T | 0.579099  | 0.411962  |
| 217 | G | -0.009986 | 0.428961  |
| 218 | T | -0.143875 | 0.391578  |
| 219 | A | 0.617273  | 0.1751    |
| 220 | T | -0.773869 | -0.02665  |
| 221 | G | 0.199213  | 0.333854  |
| 222 | T | -0.63952  | -0.820321 |
| 223 | A | -0.162889 | -0.089279 |
| 224 | A | 0.515765  | 0.774299  |
| 225 | A | 0.111481  | 0.395721  |
| 226 | T | 0.076128  | -0.001245 |
| 227 | C | 0.524662  | 0.832259  |
| 228 | C | 0.511434  | 1.088499  |
| 229 | A | -0.005372 | 0.881642  |
| 230 | A | 0.028911  | 0.906292  |
| 231 | C | 1.062598  | 0.677684  |
| 232 | T | 0.034959  | 0.455633  |
| 233 | C | 0.510957  | 0.690842  |

|     |   |           |           |
|-----|---|-----------|-----------|
| 234 | A | -0.035324 | -0.094059 |
| 235 | C | 0.347261  | 0.1771    |
| 236 | C | 0.357585  | 0.377146  |
| 237 | T | -0.14626  | -0.070968 |
| 238 | C | 1.709499  | 1.664404  |
| 239 | C | 1.058896  | 0.22641   |
| 240 | A | 0.173264  | 0.074313  |
| 241 | G | -0.018687 | -0.027344 |
| 242 | G | 0.149108  | -0.053312 |
| 243 | A | 0.085159  | 0.16582   |
| 244 | A | 2.331194  | 1.0395    |
| 245 | A | 1.021608  | 0.906319  |
| 246 | A | 1.956118  | 1.609939  |
| 247 | T | 0.051614  | 0.817769  |
| 248 | G | 0.595422  | 0.575161  |
| 249 | T | 1.482186  | -0.246782 |
| 250 | T | 1.419318  | 1.74219   |
| 251 | T | 1.965305  | 2.276584  |
| 252 | A | 1.452571  | 1.15907   |
| 253 | T | 0.564469  | 0.426281  |
| 254 | T | -0.38125  | 0.564067  |
| 255 | T | 1.274329  | -0.192518 |
| 256 | T | 1.120275  | 0.031819  |
| 257 | T | 0.51627   | 0.186158  |
| 258 | C | 0.38249   | 0.702996  |
| 259 | T | 0.119497  | 0.016727  |
| 260 | A | 0.535979  | 1.359437  |
| 261 | C | 0.760772  | 0.163294  |
| 262 | T | -0.238715 | 0.181353  |
| 263 | T | 0.366675  | 0.260721  |
| 264 | T | -0.417367 | -0.121565 |
| 265 | T | -0.74785  | -0.214342 |
| 266 | T | -0.1033   | -0.04916  |
